# Supplementary material for: Efficient pH Dependent Drug Delivery to Target Cancer Cells by Gold Nanoparticles Capped with Carboxymethyl Chitosan
Source: MDPI journal article supplement (doi:10.3390/ijms15058216), 2014-05-09

## Supplementary Information

**Figure S1.** UV-visible absorption spectra of AuNPs stabilized in CM-Chitosan by (A) Various concentrations of CM-Chitosan; (B) Various concentrations of HAuCl<sub>4</sub>; and (C) Varying the time from 2 to 10 min.

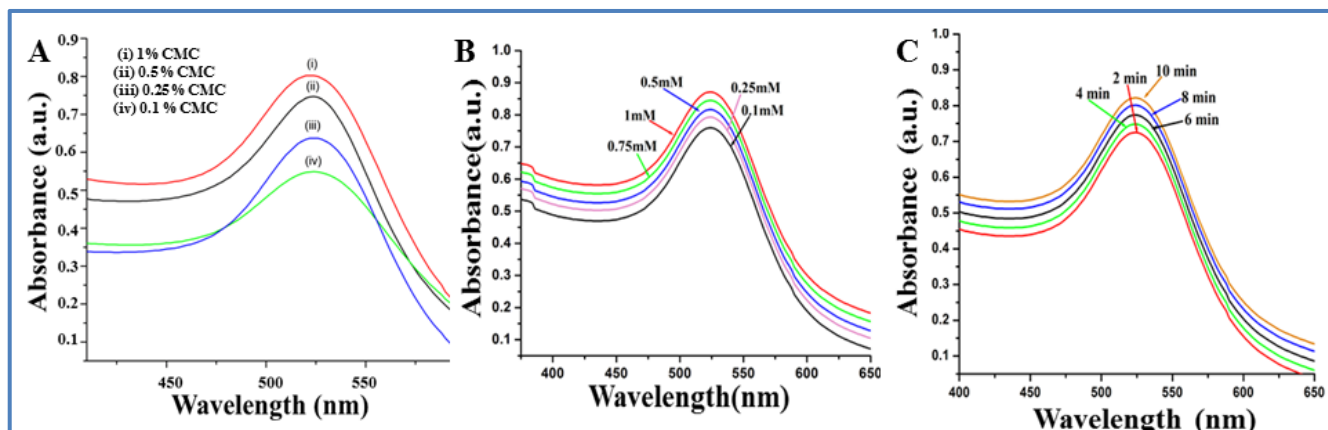

**Figure S2.** Zeta potential of CM-Chitosan capped AuNPs (A) and DOX loaded AuNPs (B).

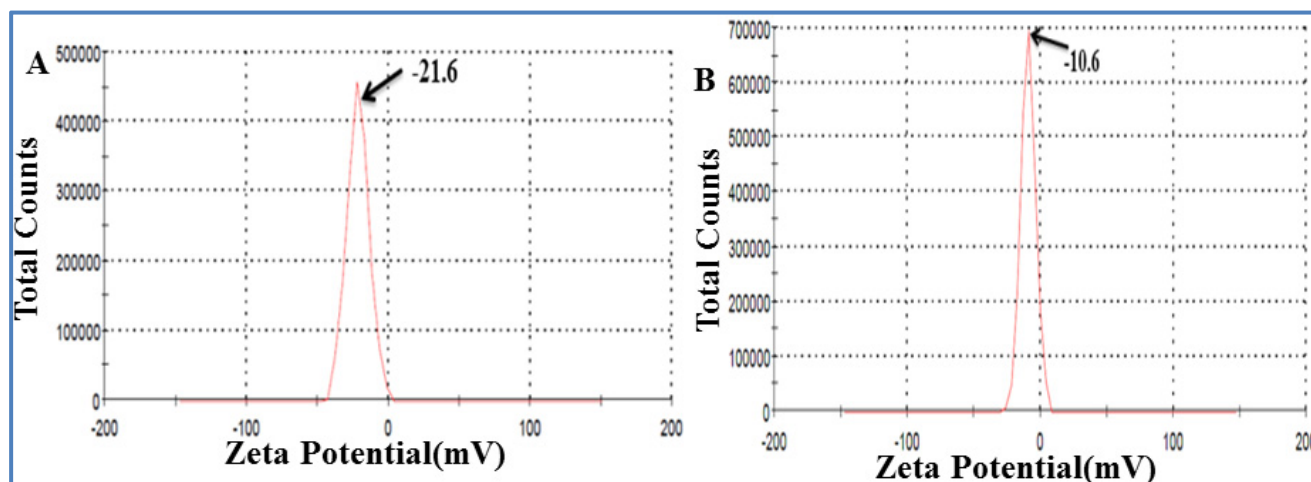

**Figure S3.** Size distribution curve of AuNPs (A) and DOX loaded AuNPs (B) from dynamic light scattering.

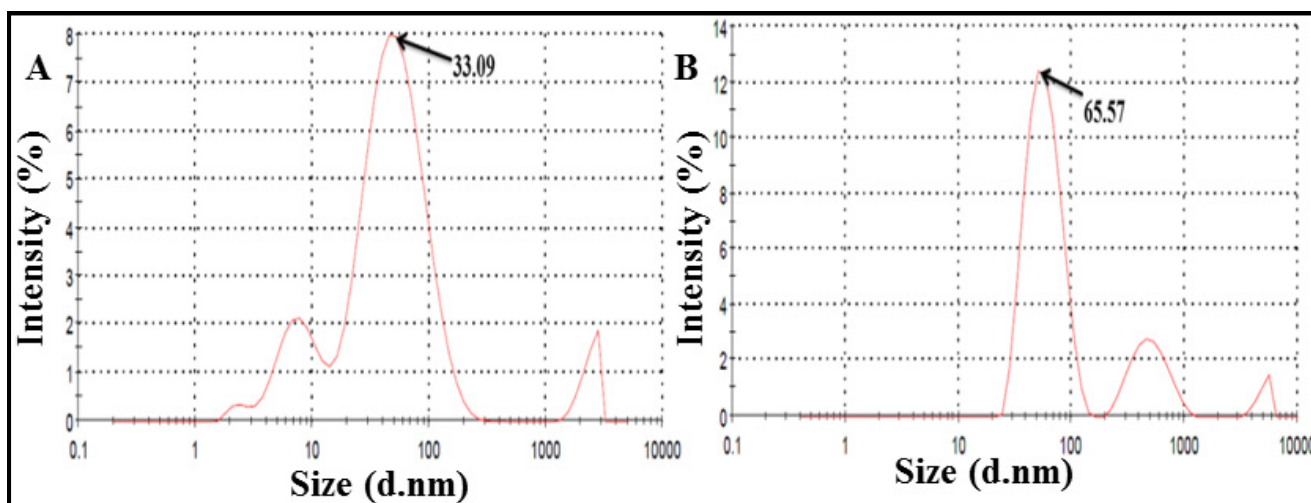

Supplement: s1 [file s1]
